# Supplementary material
Source: ML conference proceedings conference paper supplement (https://openreview.net/forum?id=iTrd5xyHLP)
Supplement: supplementary_material [file attachment]

# Supplementary Material for LLMatic: Neural Architecture Search via Large Language Models and Quality-Diversity Optimization

## Pseudocodes

---

**Algorithm 1:** Mutation Operator

---

```
input :selected_network, selected_prompt, selected_temperature;  
prompt = selected_network + selected_prompt;  
generated_network = LLM_generation(prompt, selected_temperature);  
return :generated network;
```

---

---

**Algorithm 2:** Crossover Operator

---

```
input :selected_network_1, selected_network_2  
prompt = selected_network_1 + selected_network_2 + crossover_prompt  
generated_network = LLM_generation(prompt, crossover_temperature)  
return :generated network;
```

---

---

**Algorithm 3:** Temperature Mutation

---

```
input :selected_temperature, network_loss, best_loss;  
if network_accuracy  $\geq$  best_accuracy then  
| temperature = starting_temperature + 0.05;  
else  
| temperature = starting_temperature - 0.05;  
end  
return :temperature;
```

---

---

**Algorithm 4:** Addition in archive

---

```
input :all_generated_networks_and_prompts, best_loss;
all_networks, all_prompts, temperatures = all_generated_networks_and_prompts;
foreach  $i$  in  $length(all\_networks)$  do
    FLOPS = calculate_flops(all_networks[i]);
    depth_to_width_ratio = calculate_depth_to_width_ratio(all_networks[i]);
    normalized_score = normalize(FLOPS, depth_to_width_ratio);
    find_nearest_centroid(normalized_score);
    if cell is free in network_archive then
        | add network;
    else
        if cell is filled and accuracy of network is more then
            | add network;
        else
            | Don't add the network;
        end
    end
    if  $accuracy(all\_networks[i]) \geq best\_accuracy$  then
        | network_fitness_check.append(True);
    else
        | network_fitness_check.append(False);
    end
    prompt = to_integer(all_prompts[i]);
    temperature = temperatures[i];
    normalized_score = normalize(prompt, temperature);
    find_nearest_centroid(normalized_score);
    if  $network\_fitness\_check[i] == True$  then
        | collective_fitness_score[prompt] += 1;
    else
        | pass;
    end
    if cell is free in prompt_archive then
        | add prompt individual;
    else
        | add prompt individual if collective fitness score of the prompt is greater;
    end
end
```

---

## Generated Networks

Generated network 1:

```
import torch
import torch.nn as nn
import torch.nn.functional as F

class Net(nn.Module):
    def __init__(self):
        super(Net, self).__init__()

        self.conv1 = nn.Conv2d(3, 256, kernel_size=3, padding=1)
        self.conv2 = nn.Conv2d(256, 256, kernel_size=3, padding=1)
        self.conv3 = nn.Conv2d(256, 512, kernel_size=3, padding=1)
        self.conv4 = nn.Conv2d(512, 512, kernel_size=3, padding=1)
        self.conv5 = nn.Conv2d(512, 1024, kernel_size=3, padding=1)
        self.conv6 = nn.Conv2d(1024, 1024, kernel_size=3, padding=1)
        self.conv7 = nn.Conv2d(1024, 2048, kernel_size=3, padding=1)
        self.conv8 = nn.Conv2d(2048, 2048, kernel_size=3, padding=1)

        self.bn1 = nn.BatchNorm2d(256)
        self.bn2 = nn.BatchNorm2d(512)
        self.bn3 = nn.BatchNorm2d(1024)
        self.bn4 = nn.BatchNorm2d(2048)

        self.pool = nn.MaxPool2d(2, 2)
        self.avg_pool = nn.AdaptiveAvgPool2d((1, 1))

        self.fc = nn.Linear(2048, 10)

    def forward(self, x):
        x = F.relu(self.bn1(self.conv1(x)))
        x = self.pool(F.relu(self.bn1(self.conv2(x))))
        x = F.relu(self.bn2(self.conv3(x)))
        x = self.pool(F.relu(self.bn2(self.conv4(x))))
        x = F.relu(self.bn3(self.conv5(x)))
        x = self.pool(F.relu(self.bn3(self.conv6(x))))
        x = F.relu(self.bn4(self.conv7(x)))
        x = self.pool(F.relu(self.bn4(self.conv8(x))))

        x = self.avg_pool(x)
        x = torch.flatten(x, 1)
        x = self.fc(x)

        return x
```

Generated network 2:

```
import torch
import torch.nn as nn
import torch.nn.functional as F

class Net(nn.Module):
    def __init__(self):
        super(Net, self).__init__()
        self.conv1 = nn.Conv2d(3, 16, 3, padding=1)
```

```

self.bn1 = nn.BatchNorm2d(16)
self.conv2 = nn.Conv2d(16, 32, 3, padding=1)
self.bn2 = nn.BatchNorm2d(32)
self.conv3 = nn.Conv2d(32, 64, 3, padding=1)
self.bn3 = nn.BatchNorm2d(64)
self.conv4 = nn.Conv2d(64, 128, 3, padding=1)
self.bn4 = nn.BatchNorm2d(128)
self.pool = nn.MaxPool2d(2, 2)
self.adaptive_pool = nn.AdaptiveAvgPool2d((1, 1))
self.dropout = nn.Dropout(0.5)
self.fc1 = nn.Linear(128, 512)
self.fc2 = nn.Linear(512, 10)
self.residual_conv1 = nn.Conv2d(16, 64, 1, stride=4, padding=
    =0) # 1x1 convolution for matching dimensions
self.residual_conv2 = nn.Conv2d(64, 128, 1, stride=2,
    padding=0) # 1x1 convolution for matching dimensions

def forward(self, x):
    x1 = self.pool(F.relu(self.bn1(self.conv1(x))))
    x2 = self.pool(F.relu(self.bn2(self.conv2(x1))))
    x_residual1 = self.residual_conv1(x1) # Apply 1x1
        convolution to match dimensions
    x3 = self.pool(F.relu(self.bn3(self.conv3(x2))))
    x3 += x_residual1 # Add the residual connection
    x4 = self.pool(F.relu(self.bn4(self.conv4(x3))))
    x_residual2 = self.residual_conv2(x3) # Apply 1x1
        convolution to match dimensions
    x4 += x_residual2 # Add the residual connection
    x = self.adaptive_pool(x4)
    x = x.view(-1, 128)
    x = F.relu(self.fc1(x))
    x = self.dropout(x)
    x = self.fc2(x)
    return x

```

Generated network 3:

```

class Net(nn.Module):
    def __init__(self):
        super(Net, self).__init__()

        self.conv1 = nn.Conv2d(3, 1024, kernel_size=3, padding=1)
        self.conv2 = nn.Conv2d(1024, 1024, kernel_size=3, padding=1)
        self.conv3 = nn.Conv2d(1024, 2048, kernel_size=3, padding=1)
        self.bn1 = nn.BatchNorm2d(1024)
        self.bn2 = nn.BatchNorm2d(2048)

        self.pool = nn.MaxPool2d(2, 2)
        self.avg_pool = nn.AdaptiveAvgPool2d((1, 1))

        self.fc = nn.Linear(2048, 10)

    def forward(self, x):
        x = F.relu(self.bn1(self.conv1(x)))
        x = self.pool(F.relu(self.bn1(self.conv2(x))))
        x = self.pool(F.relu(self.bn2(self.conv3(x))))

```

```

x = self.avg_pool(x)
x = torch.flatten(x, 1) # flatten all dimensions except the
    batch dimension
x = self.fc(x)

return x

```

Generated network 4:

```

class Net(nn.Module):
    def __init__(self):
        super(Net, self).__init__()
        self.conv1 = nn.Conv2d(3, 64, kernel_size=3, padding=1)
        self.bn1 = nn.BatchNorm2d(64)
        self.conv2 = nn.Conv2d(64, 64, kernel_size=3, padding=1)
        self.bn2 = nn.BatchNorm2d(64)
        self.conv3 = nn.Conv2d(64, 128, kernel_size=3, padding=1)
        self.bn3 = nn.BatchNorm2d(128)
        self.conv4 = nn.Conv2d(128, 128, kernel_size=3, padding=1)
        self.bn4 = nn.BatchNorm2d(128)
        self.pool = nn.MaxPool2d(2, 2)
        self.dropout = nn.Dropout(0.25)

        self.lstm_input_size = 128 * 16 * 16
        self.lstm_hidden_size = 256
        self.lstm_num_layers = 2

        self.lstm = nn.LSTM(input_size=self.lstm_input_size,
                            hidden_size=self.lstm_hidden_size,
                            num_layers=self.lstm_num_layers,
                            batch_first=True)

        self.fcl = nn.Linear(self.lstm_hidden_size, 512)
        self.fc2 = nn.Linear(512, 10)

    def forward(self, x):
        x = F.relu(self.bn1(self.conv1(x)))
        x = self.pool(F.relu(self.bn2(self.conv2(x))))
        x = F.relu(self.bn3(self.conv3(x)))
        x = F.relu(self.bn4(self.conv4(x)))
        x = self.dropout(x)

        x = x.view(x.size(0), 1, -1) # Reshape tensor for LSTM
        input
        x, _ = self.lstm(x) # LSTM output
        x = x[:, -1, :] # Last LSTM output

        x = F.relu(self.fcl(x))
        x = self.fc2(x)
        return x

```

Generated network 5:

```

class Net(nn.Module):
    def __init__(self):
        super(Net, self).__init__()

```

```

self.conv1 = nn.Conv2d(3, 64, kernel_size=3, padding=1)
self.bn1 = nn.BatchNorm2d(64)
self.conv2 = nn.Conv2d(64, 64, kernel_size=3, padding=1)
self.bn2 = nn.BatchNorm2d(64)
self.dropout1 = nn.Dropout2d(0.5)

self.conv3 = nn.Conv2d(64, 128, kernel_size=3, padding=1)
self.bn3 = nn.BatchNorm2d(128)
self.conv4 = nn.Conv2d(128, 128, kernel_size=3, padding=1)
self.bn4 = nn.BatchNorm2d(128)
self.dropout2 = nn.Dropout2d(0.5)

self.conv5 = nn.Conv2d(128, 256, kernel_size=3, padding=1)
self.bn5 = nn.BatchNorm2d(256)
self.conv6 = nn.Conv2d(256, 256, kernel_size=3, padding=1)
self.bn6 = nn.BatchNorm2d(256)
self.dropout3 = nn.Dropout2d(0.5)

self.fc1 = nn.Linear(256*4*4, 10)

def forward(self, x):
    out1 = F.relu(self.bn1(self.conv1(x)))
    out2 = self.dropout1(F.relu(self.bn2(self.conv2(out1))))
    out2 += out1 # skip connection
    out2 = F.max_pool2d(out2, 2)

    out3 = F.relu(self.bn3(self.conv3(out2)))
    out4 = self.dropout2(F.relu(self.bn4(self.conv4(out3))))
    out4 += out3 # skip connection
    out4 = F.max_pool2d(out4, 2)

    out5 = F.relu(self.bn5(self.conv5(out4)))
    out6 = self.dropout3(F.relu(self.bn6(self.conv6(out5))))
    out6 += out5 # skip connection
    out6 = F.max_pool2d(out6, 2)

    out6 = out6.view(out6.size(0), -1) # flatten the tensor
    out7 = self.fc1(out6)

    return out7

```
